# Supplementary material
Source: ML conference proceedings conference paper supplement (https://proceedings.mlr.press/v70/dembczynski17a.html)
Supplement: Supplementary file [file dembczynski17a-supp.pdf]

## A. Proofs from Section 2

### A.1. Proof of Proposition 1

For the sake of readability, throughout the proof we abbreviate  $\Phi = \Phi(u, v, p)$ ,  $\Phi' = \Phi(u', v', p')$ , and denote  $\Delta u = u - u'$ ,  $\Delta v = v - v'$ ,  $\Delta p = p - p'$ . In this notation, proving  $p$ -Lipschitzness for metric  $\Phi$  amounts to showing that:

$$|\Phi - \Phi'| \leq U_p |\Delta u| + V_p |\Delta v| + P_p |\Delta p|,$$

for constants  $U_p, V_p, P_p$ , which may only depend on  $p$ .

The following fact is going to be very useful in proving  $p$ -Lipschitzness. If the metric is of the rational form:  $\Phi(u, v, p) = \frac{A(u, v, p)}{B(u, v, p)} + C$ , where  $C$  is some constant,  $B(u, v, p) \geq G_p$  for some positive constant  $G_p$  (which may depend on  $p$ ), and  $|\Phi(u, v, p)| \leq \Phi_{\max}$  for some constant  $\Phi_{\max}$ , it suffices to check  $p$ -Lipschitzness of numerator and denominator separately. Indeed, using shorthand notation  $A = A(u, v, p)$ ,  $A' = A(u', v', p')$ , and similarly for  $B, B'$ :

$$\begin{aligned} \Phi - \Phi' &= \frac{A - \frac{A'}{B'} B}{B} = \frac{A - A' + \frac{A'}{B'} B' - \frac{A'}{B'} B}{B} \\ &= \frac{A - A'}{B} + \frac{A' B - B'}{B' B}, \end{aligned}$$

hence:

$$|\Phi - \Phi'| \leq \frac{|A - A'|}{G_p} + \frac{\Phi_{\max}}{G_p} |B' - B|.$$

a) *Accuracy*  $\Phi(u, v, p) = 1 - v - p + 2u$ . We have:

$$\Phi - \Phi' \leq 2\Delta u - \Delta v - \Delta p,$$

so that by triangle inequality:

$$|\Phi - \Phi'| \leq 2|\Delta u| + |\Delta v| + |\Delta p|.$$

Hence, the statement follows with  $U_p = 2$ ,  $V_p = P_p = 1$ .

b) *AM*  $\Phi(u, v, p) = 1 - \frac{vp-u}{2p(1-p)}$ . We can use the result on the rational metric by noting that  $A(u, v, p) = u - vp$ ,  $B(u, v, p) = B(p) = 2p(1-p)$ ,  $C = 1$ ,  $\Phi_{\max} = 1$ ,  $G_p = 2p(1-p)$ . We can now check the  $p$ -Lipschitzness of  $A$  and  $B$  separately:

$$\begin{aligned} A - A' &= u - vp - u' + v'p' \\ &= \Delta u + (vp' - vp) + (v'p' - vp') \\ &= \Delta u - v\Delta p - p'\Delta v, \end{aligned}$$

and since  $|v| \leq 1$ ,  $|p'| \leq 1$ ,  $p$ -Lipschitzness follows from triangle inequality. For the denominator,

$$\begin{aligned} B - B' &= 2p(1-p) - 2p'(1-p') \\ &= 2(p-p') + 2(p'^2 - p^2) \\ &= 2(1-p'-p)(p-p'), \end{aligned}$$

so that  $|B - B'| \leq 2|\Delta p|$ .

c) *Jaccard similarity*  $\Phi(u, v, p) = \frac{u}{p+v-u}$ . Follows from the rational form of the metric, since  $A(u, v, p) = u$ ,  $B(u, v, p) = p + v - u$ ,  $C = 0$ ,  $\Phi_{\max} = 1$ ,  $G_p = p$ , and the  $p$ -Lipschitzness of  $A(u, v, p)$  and  $B(u, v, p)$  is trivial to show by the triangle inequality.

d) *G-mean*  $\Phi(u, v, p) = \frac{u(1-v-p+u)}{p(1-p)}$ . Exploiting the rational form of the metric, we have  $A(u, v, p) = u(1-v-p+u)$ ,  $B(u, v, p) = p(1-p)$ ,  $C = 0$ ,  $\Phi_{\max} = 1$ ,  $G_p = p(1-p)$ . The  $p$ -Lipschitzness of  $B$  was shown above for AM measure. As for  $A$ :

$$\begin{aligned} A - A' &= (1-v-p+u)(u-u') \\ &\quad + u'(u-p-v-u'-p'-v') \\ &= (1-v-p+u)\Delta u + u'(\Delta u - \Delta v - \Delta p), \end{aligned}$$

and hence the  $p$ -Lipschitzness follows by triangle inequality and the fact that  $|1-v-p+u| \leq 2$  and  $|u'| \leq 1$ .

e) *AUC*  $\frac{(v-u)(p-u)}{p(1-p)}$ . Exploiting the rational form of the metric, we have  $A(u, v, p) = (v-u)(p-u)$  and  $B(u, v, p) = p(1-p)$ . The  $p$ -Lipschitzness of  $B$  was shown above for AM measure; as for  $A$ :

$$\begin{aligned} A - A' &= (v-u)(p-u) - (v'-u')(p-u) \\ &\quad + (v'-u')(p-u) - (v'-u')(p'-u') \\ &= (\Delta v - \Delta u)(p-u) + (v'-u')(\Delta p - \Delta u), \end{aligned}$$

and hence the  $p$ -Lipschitzness follows by triangle inequality and the fact that  $|p-u| \leq 1$  and  $|v'-u'| \leq 1$ .

f) *Linear-fractional metric* of the form:

$$\Phi(u, v, p) = \frac{a_1 + a_2 u + a_3 v + a_4 p}{b_1 + b_2 u + b_3 v + b_4 p},$$

as long as the denominator is bounded from below by some positive constant  $G_p$ . This follows immediately from the rational form of the metric, as the numerator  $A(u, v, p)$  and denominator  $B(u, v, p)$  are linear functions of  $(u, v, p)$ , so showing  $p$ -Lipschitzness of  $A(u, v, p)$  and  $B(u, v, p)$  is straightforward.

## B. Proofs from Section 3.1

### B.1. Proof of Lemma 1

We fix classifier  $h$  and use a shorthand notation  $u, v, \hat{u}, \hat{v}$  to denote  $u(h), v(h), \hat{u}(h), \hat{v}(h)$ . Due to the Lipschitz assumption:

$$|\Phi(u, v, p) - \Phi(\hat{u}, \hat{v}, \hat{p})| \leq U_p |u - \hat{u}| + V_p |v - \hat{v}| + P_p |p - \hat{p}|.$$

Fixing  $\mathbf{x} = (x_1, \dots, x_n)$  and taking expectation with respect to  $\mathbf{y} = (y_1, \dots, y_n)$  conditioned on  $\mathbf{x}$ , we have:

$$\begin{aligned} \mathbb{E}_{\mathbf{y}|\mathbf{x}} [|\Phi(u, v, p) - \Phi(\hat{u}, \hat{v}, \hat{p})|] \\ \leq U_p \mathbb{E}_{\mathbf{y}|\mathbf{x}} [|u - \hat{u}|] + V_p |v - \hat{v}| + P_p \mathbb{E}_{\mathbf{y}|\mathbf{x}} [|p - \hat{p}|]. \end{aligned}$$

Denote:

$$\begin{aligned} \tilde{p} &= \mathbb{E}_{\mathbf{y}|\mathbf{x}} [\hat{p}] = \frac{1}{n} \sum_{i=1}^n \eta(x_i), \\ \tilde{u} &= \mathbb{E}_{\mathbf{y}|\mathbf{x}} [\hat{u}] = \frac{1}{n} \sum_{i=1}^n h(x_i) \eta(x_i) \end{aligned}$$

We have:

$$\begin{aligned} \mathbb{E}_{\mathbf{y}|\mathbf{x}} [|p - \hat{p}|] &= \mathbb{E}_{\mathbf{y}|\mathbf{x}} [|p - \tilde{p} + \tilde{p} - \hat{p}|] \\ &\leq |p - \tilde{p}| + \mathbb{E}_{\mathbf{y}|\mathbf{x}} [|\tilde{p} - \hat{p}|] \\ &= |p - \tilde{p}| + \mathbb{E}_{\mathbf{y}|\mathbf{x}} \left[ \sqrt{(\tilde{p} - \hat{p})^2} \right] \\ &\leq |p - \tilde{p}| + \sqrt{\mathbb{E}_{\mathbf{y}|\mathbf{x}} [(\tilde{p} - \hat{p})^2]} \\ &= |p - \tilde{p}| + \sqrt{\text{Var}_{\mathbf{y}|\mathbf{x}}(\hat{p})} \leq |p - \tilde{p}| + \sqrt{\frac{1}{4n}}, \end{aligned}$$

where the second inequality follows from Jensen's inequality applied to a concave function  $x \mapsto \sqrt{x}$ . In an analogous way, one can show that:

$$\mathbb{E}_{\mathbf{y}|\mathbf{x}} [|u - \hat{u}|] \leq |u - \tilde{u}| + \sqrt{\frac{u}{4n}} \leq |u - \tilde{u}| + \sqrt{\frac{1}{4n}}.$$

Furthermore, using the convexity of the absolute value function, Jensen's inequality implies:

$$\begin{aligned} \left| \Phi(u, v, p) - \mathbb{E}_{\mathbf{y}|\mathbf{x}} [\Phi(\hat{u}, \hat{v}, \hat{p})] \right| \\ \leq \mathbb{E}_{\mathbf{y}|\mathbf{x}} [|\Phi(u, v, p) - \Phi(\hat{u}, \hat{v}, \hat{p})|], \end{aligned}$$

so that:

$$\begin{aligned} \left| \Phi(u, v, p) - \mathbb{E}_{\mathbf{y}|\mathbf{x}} [\Phi(\hat{u}, \hat{v}, \hat{p})] \right| &\leq U_p |u - \tilde{u}| + V_p |v - \hat{v}| \\ &\quad + P_p |p - \tilde{p}| + \frac{U_p + V_p}{2\sqrt{n}}. \end{aligned}$$

We will now show that under the class of thresholded functions  $\mathcal{H}$  specified in the statement of the theorem to which  $h$  belongs, all the terms on the right-hand side are well controlled. The rest of the proof follows in a straightforward way from Hoeffding's inequality and Vapnik-Chervonenkis bounds, except for minor, technical details, which are included for completeness.

We first apply Hoeffding's inequality to say that with probability at least  $1 - \delta/2$ ,

$$|p - \tilde{p}| \leq \sqrt{\frac{\log \frac{4}{\delta}}{2n}}.$$

Similarly, using standard Rademacher complexity arguments (see, e.g. Mohri et al., 2012), we have, uniformly over all  $h \in \mathcal{H}$ , with probability  $1 - \delta/4$ ,

$$|v - \hat{v}| \leq 2\mathbb{E}_{\mathbf{x}} [\mathcal{R}_n(\mathcal{H})] + \sqrt{\frac{\log \frac{4}{\delta}}{2n}},$$

and similarly, with probability  $1 - \delta/4$ ,

$$|u - \tilde{u}| \leq 2\mathbb{E}_{\mathbf{x}} [\mathcal{R}_n(\mathcal{H}_\eta)] + \sqrt{\frac{\log \frac{4}{\delta}}{2n}},$$

where  $\mathcal{H}_\eta = \{h \cdot \eta : h \in \mathcal{H}\}$ , and:

$$\mathcal{R}_n(\mathcal{H}) = \mathbb{E}_{\sigma} \left[ \sup_{h \in \mathcal{H}} \frac{1}{n} \left| \sum_{i=1}^n \sigma_i h(x_i) \right| \right]$$

is the Rademacher complexity<sup>6</sup> of  $\mathcal{H}$ . Furthermore, if we let  $z_i \in \{-1, 1\}$ ,  $i = 1, \dots, n$ , with  $\Pr(z_i = 1) = \frac{1+\eta(x_i)}{2}$ , so that  $\mathbb{E}[z_i] = \eta(x_i)$ , we have:

$$\sum_{i=1}^n \sigma_i h(x_i) \eta(x_i) = \mathbb{E}_{\mathbf{z}} \left[ \sum_{i=1}^n \sigma_i h(x_i) z_i \right],$$

so that:

$$\begin{aligned} \mathcal{R}_n(\mathcal{H}_\eta) &= \mathbb{E}_{\sigma} \left[ \sup_{h \in \mathcal{H}} \frac{1}{n} \left| \mathbb{E}_{\mathbf{z}} \left[ \sum_{i=1}^n \sigma_i h(x_i) z_i \right] \right| \right] \\ &\leq \mathbb{E}_{\sigma, \mathbf{z}} \left[ \sup_{h \in \mathcal{H}} \frac{1}{n} \left| \sum_{i=1}^n \sigma_i h(x_i) z_i \right| \right] \\ &= \mathbb{E}_{\sigma} \left[ \sup_{h \in \mathcal{H}} \frac{1}{n} \left| \sum_{i=1}^n \sigma_i h(x_i) \right| \right] = \mathcal{R}_n(\mathcal{H}), \end{aligned}$$

where the inequality is due to Jensen's inequality applied to convex functions  $|\cdot|$  and  $\sup\{\cdot\}$ , and the second equality is due to the fact that  $\sigma_i z_i$  and  $\sigma_i$  are distributed in the same way.

Thus choosing  $L_p = \max\{U_p, V_p, P_p\}$ , with probability  $1 - \delta$ , uniformly over all  $h \in \mathcal{H}$ ,

$$\begin{aligned} \left| \Phi(u, v, p) - \mathbb{E}_{\mathbf{y}|\mathbf{x}} [\Phi(\hat{u}, \hat{v}, \hat{p})] \right| &\leq 4L_p \mathbb{E}_{\mathbf{x}} [\mathcal{R}_n(\mathcal{H})] \\ &\quad + 3L_p \sqrt{\frac{\log \frac{4}{\delta}}{2n}} + \frac{L_p}{\sqrt{n}}. \end{aligned}$$

Now, if  $\mathcal{H}$  is the class of threshold functions on  $\eta$ , its growth function (Mohri et al., 2012) is equal to  $m + 1$ , and thus we have<sup>7</sup>:

$$\mathcal{R}_n(\mathcal{H}) \leq \sqrt{\frac{2 \log(n+1)}{n}},$$

<sup>6</sup>Variables  $\sigma_i$ ,  $i = 1, \dots, n$ , are i.i.d. Rademacher variables distributed according to  $\mathbb{P}(\sigma_i = 1) = \mathbb{P}(\sigma_i = -1) = \frac{1}{2}$ .

<sup>7</sup>We could alternatively use the fact that VC-dimension of  $\mathcal{H}$  is 1, which would give a bound with  $\log(n+1)$  replaced by  $1 + \log(n)$ .

so that with probability  $1 - \delta$ , uniformly over all  $h \in \mathcal{H}$ , we get the bound in the statement of the theorem. The proof is complete.

**Lower bound.** The dependence  $\tilde{O}(1/\sqrt{n})$  on the sample size stated in Lemma 1 cannot be improved in general. To see this, take a metric  $\Phi(u, v, p) = u$ ,  $p$ -Lipschitzness of which is trivial to show. Choose  $h(x) = 1$  for all  $x$ . Then,  $u(h) = p$ , while  $\hat{u}(h) = \frac{1}{n} \sum_{i=1}^n y_i$ . Hence,  $|\Phi(u, v, p) - \mathbb{E}_{\mathbf{y}|\mathbf{x}} [\Phi(\hat{u}, \hat{v}, \hat{p})]| = |p - \tilde{p}|$ , where  $\tilde{p} = \frac{1}{n} \sum_{i=1}^n \eta(x_i)$  and  $\mathbb{E}_{\mathbf{x}} [\tilde{p}] = p$ . Assume that  $\eta(x)$  follows a binomial distribution with  $\mathbb{P}(\eta(x) = 1) = \mathbb{P}(\eta(x) = 0) = \frac{1}{2}$ . Denote  $|p - \tilde{p}|$  by  $Z$ . By Khinchine inequality,  $\mathbb{E}[Z] \geq 2c\sqrt{\mathbb{E}[Z^2]} = c/\sqrt{n}$  for some constant  $c > 0$ . Furthermore, by Paley-Zygmund inequality  $\mathbb{P}(Z > \mathbb{E}[Z]/2) \geq \frac{(\mathbb{E}[Z])^2}{4\mathbb{E}[Z^2]} \geq c^2$ . Hence, with constant probability,

$$\left| \Phi(u, v, p) - \mathbb{E}_{\mathbf{y}|\mathbf{x}} [\Phi(\hat{u}, \hat{v}, \hat{p})] \right| \geq \frac{c}{2\sqrt{n}},$$

for some  $c > 0$ , which shows that the rate  $\tilde{O}(1/\sqrt{n})$  cannot be improved.

## B.2. Proof of Theorem 1

First, note that for a given  $\mathbb{P}$ ,  $p$ -Lipschitzness implies that  $\Phi(u, v, p)$  is continuous as a function of  $(u, v)$ . Let  $\mathcal{H} = \{h_\eta \mid h_\eta = \mathbb{1}_{\eta(x) \geq \eta}, \eta \in [0, 1]\}$  be the set of binary threshold functions on  $\eta(x)$ . By Assumption 1,  $u(h_\eta)$  and  $v(h_\eta)$  are continuous in the threshold  $\eta$ , and hence the maximizer of  $\Phi(u, v, p)$  over  $\mathcal{H}$  exists due to compactness of the domain of  $\eta$ . The existence of the maximizer, together with Assumption 1 and TP monotonicity implies by (Narasimhan et al., 2014a, Lemma 11) that  $h_{\text{PU}}^* \in \mathcal{H}$ , i.e. the optimal PU classifier is a threshold function.<sup>8</sup>

For any given  $\mathbf{x} = (x_1, \dots, x_n)$ , let  $h_{\text{ETU}}^*(\mathbf{x})$  be the optimal ETU classifier. By TP monotonicity of  $\Psi$ , (Natarajan et al., 2016, Theorem 1) implies that  $h_{\text{ETU}}^*(\mathbf{x})$  satisfies:

$$\begin{aligned} & \max_{i=1, \dots, n} \{\eta(x_i) : h_{\text{ETU}}^*(x_i) = 0\} \\ & \leq \min_{i=1, \dots, n} \{\eta(x_i) : h_{\text{ETU}}^*(x_i) = 1\}. \end{aligned}$$

However, by Assumption 1,  $\eta(x_i) \neq \eta(x_j)$  for all  $i \neq j$  with probability one, so that the condition above is satisfied with strict inequality, and hence there exists  $\tau^*$ , which is between  $\max\{\eta(x_i) : h_{\text{ETU}}^*(x_i) = 0\}$  and  $\min\{\eta(x_i) : h_{\text{ETU}}^*(x_i) = 1\}$ . This means that  $h_{\text{ETU}}^*(\mathbf{x})$

<sup>8</sup>Lemma 11 of Narasimhan et al. (2014a) requires that the PU maximizer within  $\mathcal{H}$  is  $h_\eta$  for some  $\eta \in (0, 1)$ . However, we do not impose this constraint here because the lemma can easily be extended to the case  $\eta \in [0, 1]$  under our assumption that  $\eta(x)$  has a density over  $[0, 1]$ .

is a threshold function on  $\eta(x)$  with threshold  $\tau^*$ , i.e.  $h_{\text{ETU}}^* \in \mathcal{H}$ .

To conclude, with probability one,  $h_{\text{ETU}}^*(\mathbf{x}), h_{\text{PU}}^* \in \mathcal{H}$ .

Now, define  $\epsilon/2 = 4L_p \sqrt{\frac{2 \log(n+1)}{n}} + 3L_p \sqrt{\frac{\log \frac{4}{\delta}}{2n}} + \frac{L_p}{\sqrt{n}}$ . Then, with probability  $1 - \delta$  (over the random choice of  $\mathbf{x}$ ),

$$\begin{aligned} & \Phi(u(h_{\text{ETU}}^*(\mathbf{x})), v(h_{\text{ETU}}^*(\mathbf{x})), p) \\ & \leq \Phi(u(h_{\text{PU}}^*), v(h_{\text{PU}}^*), p) \\ & \leq \mathbb{E}_{\mathbf{y}|\mathbf{x}} [\Phi(\hat{u}(h_{\text{PU}}^*), \hat{v}(h_{\text{PU}}^*), \hat{p})] + \epsilon/2 \\ & \leq \mathbb{E}_{\mathbf{y}|\mathbf{x}} [\Phi(\hat{u}(h_{\text{ETU}}^*(\mathbf{x})), \hat{v}(h_{\text{ETU}}^*(\mathbf{x})), \hat{p})] + \epsilon/2, \\ & \leq \Phi(u(h_{\text{ETU}}^*(\mathbf{x})), v(h_{\text{ETU}}^*(\mathbf{x})), p) + \epsilon, \end{aligned}$$

where we used Lemma 1 twice in the second and fourth inequality. Hence, with probability  $1 - \eta$ ,

$$\begin{aligned} & \left| \Phi(u(h_{\text{ETU}}^*(\mathbf{x})), v(h_{\text{ETU}}^*(\mathbf{x})), p) \right. \\ & \quad \left. - \Phi(u(h_{\text{PU}}^*), v(h_{\text{PU}}^*), p) \right| \leq \epsilon. \end{aligned}$$

Using analogous argument, one can show that with probability  $1 - \delta$ ,

$$\begin{aligned} & \left| \mathbb{E}_{\mathbf{y}|\mathbf{x}} [\Phi(\hat{u}(h_{\text{ETU}}^*(\mathbf{x})), \hat{v}(h_{\text{ETU}}^*(\mathbf{x})), \hat{p})] \right. \\ & \quad \left. - \mathbb{E}_{\mathbf{y}|\mathbf{x}} [\Phi(\hat{u}(h_{\text{PU}}^*), \hat{v}(h_{\text{PU}}^*), \hat{p})] \right| \leq \epsilon, \end{aligned}$$

which finishes the proof.

## B.3. Finite Sample Regime: Proof of Theorem 2

The PU-optimal classifier is:

$$h_{\text{PU}}^* = \operatorname{argmax}_h \Phi_{\text{Prec}}(u(h), v(h), p) = \operatorname{argmax}_h \frac{u(h)}{v(h) + \alpha}.$$

**Proposition 2.**

$$h_{\text{PU}}^*(x) = \begin{cases} 1, & \text{if } x \in \mathcal{X}_1, \\ 0, & \text{else.} \end{cases}$$

*Proof.* Note that for the defined  $h_{\text{PU}}^*$  classifier, we have  $u(h_{\text{PU}}^*) = v(h_{\text{PU}}^*) = \mathbb{P}(\mathcal{X}_1)$ , and

$$\Phi_{\text{Prec}}(u(h_{\text{PU}}^*), v(h_{\text{PU}}^*), p) = \frac{\mathbb{P}(\mathcal{X}_1)}{\mathbb{P}(\mathcal{X}_1) + \alpha}.$$

Firstly, observe that for any candidate optimal classifier  $h'$ , it must hold that  $h'(x) = 0$  for all  $x \in \mathcal{X}_3$  (otherwise the metric strictly decreases). Now, suppose there exists a classifier  $h' \neq h_{\text{PU}}^*$  which has strictly higher utility than  $h_{\text{PU}}^*$ . Then, it must be that  $h'(x) = 1$  for all

$x \in \mathcal{X}_2$ . We have,  $u(h') = \mathbb{P}(\mathcal{X}_1) + \mathbb{P}(\mathcal{X}_2)(1 - \sqrt{\alpha})$  and  $v(h') = \mathbb{P}(\mathcal{X}_1) + \mathbb{P}(\mathcal{X}_2)$ . So:

$$\Phi_{\text{Prec}}(u(h'), v(h'), p) = \frac{\mathbb{P}(\mathcal{X}_1) + \mathbb{P}(\mathcal{X}_2)(1 - \sqrt{\alpha})}{\mathbb{P}(\mathcal{X}_1) + \mathbb{P}(\mathcal{X}_2) + \alpha}.$$

But for the chosen small value of  $\alpha$ , we can show the contradiction that:

$$\Phi_{\text{Prec}}(u(h'), v(h'), p) < \Phi_{\text{Prec}}(u(h_{\text{PU}}^*), v(h_{\text{PU}}^*), p).$$

Therefore,  $h_{\text{PU}}^*$  as stated is indeed optimal.  $\square$

We see from the above constructed example that the PU optimal classifier assigns negative labels to 50% of the data which are highly likely to belong to the positive class. PU is sensitive to label noise if the metric is less stable as implied by the high  $p$ -Lipschitz constant. Next, we show that ETU is relatively more robust.

Given a set of instances  $\mathbf{x} = \{x_1, x_2, \dots, x_n\}$ , recall that the ETU-optimal assignments can be computed as:

$$h_{\text{ETU}}^*(\mathbf{x}) = \mathbf{s}^* := \operatorname{argmax}_{\mathbf{s} \in \{0,1\}^n} \mathbb{E}_{\mathbf{y} \sim \mathbb{P}(\cdot|\mathbf{x})} \Phi_{\text{Prec}}(\mathbf{s}, \mathbf{y}).$$

**Proposition 3.** *On the subset of instances in  $\mathbf{x}$  that have deterministic labels, the ETU-optimal predictions satisfy:*

$$h_{\text{ETU}}^*(x_j) = s_j^* = \begin{cases} 1, & \text{if } x \in \mathcal{X}_1, \\ 0, & \text{if } x \in \mathcal{X}_3. \end{cases}$$

Note that the predictions coincide with that of  $h_{\text{PU}}^*$  on these indices.

*Proof.* Let  $\mathcal{I}_i = \{j : x_j \in \mathcal{X}_i\}$ , for  $i = 1, 2, 3$ . Note that the optimal value at the solution  $\mathbf{s}^*$  is given by:

$$\mathbb{E}_{\mathbf{y} \sim \mathbb{P}(\cdot|\mathbf{x})} \Phi_{\text{Prec}}(\mathbf{s}^*, \mathbf{y}) = \frac{\sum_{j \in \mathcal{I}_1} s_j^* + \Delta(\mathbf{s}_{\mathcal{I}_2}^*, \mathbf{y}_{\mathcal{I}_2})}{\sum_{j \in \mathcal{I}_1 \cup \mathcal{I}_3} s_j^* + \sum_{j \in \mathcal{I}_2} s_j^* + \alpha n}, \quad (2)$$

where  $\mathbf{s}_{\mathcal{I}_2}^*$  indicates the optimal assignments corresponding to indices in  $\mathcal{I}_2$  and  $\Delta(\mathbf{s}_{\mathcal{I}_2}^*, \mathbf{y}_{\mathcal{I}_2})$  is a quantity that depends only on indices in  $\mathcal{I}_2$ , and is given by:

$$\Delta(\mathbf{s}_{\mathcal{I}_2}^*, \mathbf{y}_{\mathcal{I}_2}) = \sum_{\mathbf{y}_{\mathcal{I}_2} \in \{0,1\}^{|\mathcal{I}_2|}} \mathbb{P}(\mathbf{y}_{\mathcal{I}_2}) \langle \mathbf{y}_{\mathcal{I}_2}, \mathbf{s}_{\mathcal{I}_2}^* \rangle \quad (3)$$

Fixing the optimal predictions for indices corresponding to  $\mathcal{I}_2$ , the value (2) is maximized by maximizing the numerator term  $\sum_{j \in \mathcal{I}_1} s_j^*$  and minimizing the denominator term  $\sum_{j \in \mathcal{I}_1 \cup \mathcal{I}_3} s_j^*$ . This is achieved precisely when the optimal solution satisfies the statement in the proposition. The proof is complete.  $\square$

We know from Proposition 2 that  $h_{\text{PU}}^*$  sets the labels corresponding to indices in the set  $\mathcal{I}_2$  to 0. Now let us examine what happens in the case of ETU, when labels have mild noise (i.e. with some small probability  $\sqrt{\epsilon}$ , the label of an instance from  $\mathcal{X}_2$  can be 0), at optimality. Consider a candidate optimal solution  $\mathbf{s}'$  that behaves exactly like  $h_{\text{PU}}^*$ , i.e.  $s'_j = 0$  for all  $j \in \mathcal{I}_2$ , for some  $1 \leq k \leq |\mathcal{I}_2|$ .

Then,  $\Delta(\mathbf{s}'_{\mathcal{I}_2}, \mathbf{y}_{\mathcal{I}_2}) = 0$ , so:

$$\mathbb{E}_{\mathbf{y} \sim \mathbb{P}(\cdot|\mathbf{x})} \Phi_{\text{Prec}}(\mathbf{s}', \mathbf{y}) = \frac{|\mathcal{I}_1|}{|\mathcal{I}_1| + \alpha n}. \quad (4)$$

Now, consider another candidate solution  $\mathbf{s}''$  that is equal to  $\mathbf{s}'$ , but has a value of 1 corresponding to a subset of indices  $j_1, j_2, \dots, j_k \in \mathcal{I}_2$ . The value of this solution can be shown to be:

$$\mathbb{E}_{\mathbf{y} \sim \mathbb{P}(\cdot|\mathbf{x})} \Phi_{\text{Prec}}(\mathbf{s}'', \mathbf{y}) = \frac{|\mathcal{I}_1| + k(1 - \epsilon)}{|\mathcal{I}_1| + k + \alpha n}. \quad (5)$$

Comparing equations (4) and (5), we have that if:

$$\epsilon < \frac{\alpha n}{|\mathcal{I}_1| + \alpha n}, \quad (6)$$

then  $\mathbf{s}''$  is a strictly better solution than  $\mathbf{s}'$ . In particular, as (5) is monotonic in  $k$ , the optimal choice is  $k = |\mathcal{I}_2|$ . This immediately leads to the following corollary.

**Corollary 1.** *1. If  $|\mathcal{I}_2| = 0$ , then*

$$h_{\text{ETU}}^*(\mathbf{x}) := \mathbf{s}^* = h_{\text{PU}}^*(\mathbf{x}).$$

*2. Otherwise, if  $\epsilon < \frac{\alpha}{1+\alpha}$ , then*

$$h_{\text{ETU}}^*(\mathbf{x}) := \mathbf{s}^* \neq h_{\text{PU}}^*(\mathbf{x}).$$

*In particular,  $h_{\text{ETU}}^*$  assigns label 1 to all instances that are overwhelmingly positive under  $\mathbb{P}$ , corresponding to indices  $\mathcal{I}_2$ , whereas  $h_{\text{PU}}^*$  assigns label 0.*

*3. If  $|\mathcal{I}_1| = 0$ , but  $|\mathcal{I}_2| > 0$  then for any  $0 < \epsilon < 1$ ,*

$$h_{\text{ETU}}^*(\mathbf{x}) := \mathbf{s}^* \neq h_{\text{PU}}^*(\mathbf{x}) := \mathbf{0}.$$

Note that  $\epsilon < \alpha/(1 + \alpha)$  does *not* hold for our choice of  $\epsilon = \sqrt{\alpha}$ . However, case 3 in Corollary 1 is sufficient to establish the bound in Theorem 2, when  $\mathbb{P}(\mathcal{X}_2)$  is very large.

## C. Proofs for Section 4.1

Fix a binary classifier  $h: X \rightarrow \{0, 1\}$  and let the input sample  $\mathbf{x} = (x_1, \dots, x_n)$  be generated i.i.d. from  $\mathbb{P}$ . For the sake of clarity, abbreviate  $\eta(x_i) = \eta_i$  and  $h(x_i) = h_i$ ,  $i = 1, \dots, n$ . In the proofs of Lemma 2 and Lemma 3 we will use the following:

- *Empirical quantities:*

$$\hat{u}(h) = \frac{1}{n} \sum_{i=1}^n h_i y_i, \quad \hat{v}(h) = \frac{1}{n} \sum_{i=1}^n h_i, \quad \hat{p} = \frac{1}{n} \sum_{i=1}^n y_i,$$

- *Semi-empirical quantities:*

$$\tilde{u}(h) = \frac{1}{n} \sum_{i=1}^n h_i \eta_i, \quad \text{and} \quad \tilde{p} = \frac{1}{n} \sum_{i=1}^n \eta_i$$

(we do not define  $\tilde{v}(h)$ , as it would be the same as  $\hat{v}(h)$ ).

Note that:

$$\tilde{u}(h) = \mathbb{E}_{\mathbf{y}|\mathbf{x}} [\hat{u}(h)], \quad \text{and} \quad \tilde{p} = \mathbb{E}_{\mathbf{y}|\mathbf{x}} [\hat{p}].$$

We will jointly denote  $\hat{\mathbf{z}} = (\hat{u}(h), \hat{p})$ , and similarly  $\tilde{\mathbf{z}} = (\tilde{u}(h), \tilde{p})$ . We will also abbreviate  $\Phi(\hat{\mathbf{z}}) = \Phi(\hat{u}(h), \hat{v}(h), \hat{p})$  and similarly for  $\Phi(\tilde{\mathbf{z}})$ .

### C.1. Proof of Lemma 2

Assume  $\Phi$  is two-times differentiable, with all partial second-order derivatives bounded by  $A$ . Taylor expanding  $\Phi(\hat{\mathbf{z}})$  around point  $\tilde{\mathbf{z}}$  up to the second order gives:

$$\begin{aligned} \Phi(\hat{\mathbf{z}}) &= \Phi(\tilde{\mathbf{z}}) + \nabla\Phi(\tilde{\mathbf{z}})^\top (\hat{\mathbf{z}} - \tilde{\mathbf{z}}) \\ &\quad + \frac{1}{2} (\hat{\mathbf{z}} - \tilde{\mathbf{z}})^\top \nabla^2\Phi(\mathbf{z}) (\hat{\mathbf{z}} - \tilde{\mathbf{z}}) \end{aligned}$$

for some  $\mathbf{z}$  between  $\hat{\mathbf{z}}$  and  $\tilde{\mathbf{z}}$ . Note that  $\mathbb{E}_{\mathbf{y}|\mathbf{x}} [\hat{\mathbf{z}}] = \tilde{\mathbf{z}}$ , so that:

$$\mathbb{E}_{\mathbf{y}|\mathbf{x}} [\nabla\Phi(\tilde{\mathbf{z}})^\top (\hat{\mathbf{z}} - \tilde{\mathbf{z}})] = 0.$$

Furthermore, note that:

$$\begin{aligned} (\hat{\mathbf{z}} - \tilde{\mathbf{z}})^\top \nabla^2\Phi(\mathbf{z}) (\hat{\mathbf{z}} - \tilde{\mathbf{z}}) &= \nabla_{uu}^2 (\hat{u} - \tilde{u})^2 + 2\nabla_{up}^2 (\hat{u} - \tilde{u})(\hat{p} - \tilde{p}) + \nabla_{pp}^2 (\hat{p} - \tilde{p})^2 \\ &\leq A((\hat{u} - \tilde{u})^2 + 2|(\hat{u} - \tilde{u})(\hat{p} - \tilde{p})| + (\hat{p} - \tilde{p})^2) \\ &\leq 2A((\hat{u} - \tilde{u})^2 + (\hat{p} - \tilde{p})^2), \end{aligned}$$

where we used elementary inequality  $ab \leq a^2 + b^2$ , and  $\nabla_{uu}^2, \nabla_{up}^2, \nabla_{pp}^2$  denote the second-order derivatives evaluated at some  $\mathbf{z} = (u, p)$ . Hence:

$$\begin{aligned} \mathbb{E}_{\mathbf{y}|\mathbf{x}} [(\hat{\mathbf{z}} - \tilde{\mathbf{z}})^\top \nabla^2\Phi(\tilde{\mathbf{z}}) (\hat{\mathbf{z}} - \tilde{\mathbf{z}})] &\leq 2A \left( \mathbb{E}_{\mathbf{y}|\mathbf{x}} [(\hat{u} - \tilde{u})^2] + \mathbb{E}_{\mathbf{y}|\mathbf{x}} [(\hat{p} - \tilde{p})^2] \right). \end{aligned}$$

Since  $\hat{u}$  is the empirical average over  $n$  labels and  $\tilde{u}$  is its expectation (over the labels),  $\mathbb{E}_{\mathbf{y}|\mathbf{x}} [(\hat{u} - \tilde{u})^2]$  is the variance of  $\hat{u}$ , which is at most  $\frac{1}{4n}$ , because  $\hat{u} \in [0, 1]$ :

$$\text{var}(\hat{u}) = \frac{1}{n^2} \sum_{i=1}^n \text{var}(h_i y_i) \leq \frac{1}{n} \sum_{i=1}^n h_i \eta_i (1 - \eta_i) \leq \frac{1}{4n},$$

where we used the independence of labels  $y_i, i = 1, \dots, n$ . Similarly,  $\mathbb{E}_{\mathbf{y}|\mathbf{x}} [(\hat{p} - \tilde{p})^2]$  is at most  $\frac{1}{4n}$ , which in total gives:

$$\mathbb{E}_{\mathbf{y}|\mathbf{x}} [(\hat{\mathbf{z}} - \tilde{\mathbf{z}})^\top \nabla^2\Phi(\tilde{\mathbf{z}}) (\hat{\mathbf{z}} - \tilde{\mathbf{z}})] \leq \frac{A}{n}.$$

Using a lower bound  $-A$  on the second-order derivatives and performing a similar chain of reasoning, one also gets:

$$\mathbb{E}_{\mathbf{y}|\mathbf{x}} [(\hat{\mathbf{z}} - \tilde{\mathbf{z}})^\top \nabla^2\Phi(\tilde{\mathbf{z}}) (\hat{\mathbf{z}} - \tilde{\mathbf{z}})] \geq -\frac{A}{n}.$$

From that we have:

$$\|\mathbb{E}_{\mathbf{y}|\mathbf{x}} [\Phi(\hat{\mathbf{z}})] - \Phi(\tilde{\mathbf{z}})\| \leq \frac{A}{2n},$$

which is exactly what was to be shown.

### C.2. Proof of Lemma 3

Assume  $\Phi$  is three-times differentiable, with all partial third-order derivatives bounded by  $B$ . Taylor expanding  $\Phi(\hat{\mathbf{z}})$  around point  $\tilde{\mathbf{z}}$  up to the third order gives:

$$\begin{aligned} \Phi(\hat{\mathbf{z}}) &= \Phi(\tilde{\mathbf{z}}) + \nabla\Phi(\tilde{\mathbf{z}})^\top (\hat{\mathbf{z}} - \tilde{\mathbf{z}}) \\ &\quad + \frac{1}{2} (\hat{\mathbf{z}} - \tilde{\mathbf{z}})^\top \nabla^2\Phi(\tilde{\mathbf{z}}) (\hat{\mathbf{z}} - \tilde{\mathbf{z}}) \\ &\quad + \frac{1}{6} \sum_{\alpha, \beta, \gamma=1}^2 \frac{\partial^3\Phi(\mathbf{z})}{\partial z_\alpha \partial z_\beta \partial z_\gamma} (\hat{z}_\alpha - \tilde{z}_\alpha)(\hat{z}_\beta - \tilde{z}_\beta)(\hat{z}_\gamma - \tilde{z}_\gamma), \end{aligned}$$

for some  $\mathbf{z}$  between  $\hat{\mathbf{z}}$  and  $\tilde{\mathbf{z}}$ . First note that  $\mathbb{E}_{\mathbf{y}|\mathbf{x}} [\hat{\mathbf{z}}] = \tilde{\mathbf{z}}$ , so that:

$$\mathbb{E}_{\mathbf{y}|\mathbf{x}} [\nabla\Phi(\tilde{\mathbf{z}})^\top (\hat{\mathbf{z}} - \tilde{\mathbf{z}})] = 0.$$

Furthermore,

$$\begin{aligned} \mathbb{E}_{\mathbf{y}|\mathbf{x}} [(\hat{\mathbf{z}} - \tilde{\mathbf{z}})^\top \nabla^2\Phi(\tilde{\mathbf{z}}) (\hat{\mathbf{z}} - \tilde{\mathbf{z}})] &= \mathbb{E}_{\mathbf{y}|\mathbf{x}} \left[ \text{tr} \left( \nabla^2\Phi(\tilde{\mathbf{z}}) (\hat{\mathbf{z}} - \tilde{\mathbf{z}}) (\hat{\mathbf{z}} - \tilde{\mathbf{z}})^\top \right) \right] \\ &= \text{tr} \left( \nabla^2\Phi(\tilde{\mathbf{z}}) \Sigma \right), \end{aligned}$$

where  $\Sigma = \mathbb{E}_{\mathbf{y}|\mathbf{x}} [(\hat{\mathbf{z}} - \tilde{\mathbf{z}}) (\hat{\mathbf{z}} - \tilde{\mathbf{z}})^\top]$  is the covariance matrix of  $\hat{\mathbf{z}} - \tilde{\mathbf{z}}$ . By independence of examples,

$$\begin{aligned} \Sigma &= \frac{1}{n^2} \sum_{i=1}^n \mathbb{E}_{y_i|x_i} \left[ \begin{pmatrix} h_i(y_i - \eta_i)^2 & h_i(y_i - \eta_i)^2 \\ h_i(y_i - \eta_i)^2 & (y_i - \eta_i)^2 \end{pmatrix} \right] \\ &= \frac{1}{n^2} \sum_{i=1}^n \eta_i (1 - \eta_i) \begin{pmatrix} h_i & h_i \\ h_i & 1 \end{pmatrix}, \end{aligned}$$

so that:

$$\text{tr} \left( \nabla^2\Phi(\tilde{\mathbf{z}}) \Sigma \right) = (\nabla_{uu}^2 + 2\nabla_{up}^2) s_u + \nabla_{pp}^2 s_p,$$

where:

$$s_p := \frac{1}{n^2} \sum_{i=1}^n \eta_i (1 - \eta_i),$$

$$s_u := \frac{1}{n^2} \sum_{i=1}^n h_i \eta_i (1 - \eta_i),$$

and  $\nabla_{uu}^2, \nabla_{up}^2, \nabla_{pp}^2$  denote be the second-order derivative terms evaluated at  $(\tilde{u}, \tilde{p})$ . Thus, to finish the proof, we only need to show that the first order term is bounded by  $\frac{B}{3}n^{-3/2}$ . To this end, note that for any numbers  $a_i, b_{ijk}$ , such that  $|b_{ijk}| \leq B, i, j, k = 1, \dots, 2$ :

$$\sum_{ijk} b_{ijk} a_i a_j a_k \leq B \sum_{ijk} |a_i| |a_j| |a_k| = B(|a_1| + |a_2|)^3.$$

By Hölder's inequality,

$$\sum_{i=1}^2 |a_i| \leq \left( \sum_{i=1}^2 |a_i|^3 \right)^{1/3} 2^{2/3},$$

so that:

$$B(|a_1| + |a_2| + |a_3|)^3 \leq 4B \left( |a_1|^3 + |a_2|^3 + |a_3|^3 \right).$$

Hence, if we bound:

$$\frac{\partial^3 \Phi(z)}{\partial z_\alpha \partial z_\beta \partial z_\gamma} \leq B,$$

the third-order term  $\frac{1}{6} \sum_{\alpha, \beta, \gamma=1}^2 \dots$  is bounded by:

$$\frac{2B}{3} \left( |\hat{u} - \tilde{u}|^3 + |\hat{p} - \tilde{p}|^3 \right)$$

We now bound  $\mathbb{E}_{\mathbf{y}|\mathbf{x}} [|\hat{u} - \tilde{u}|^3]$  and  $\mathbb{E}_{\mathbf{y}|\mathbf{x}} [|\hat{p} - \tilde{p}|^3]$ . By Cauchy-Schwarz inequality,

$$\mathbb{E}_{\mathbf{y}|\mathbf{x}} [|\hat{p} - \tilde{p}|^3] \leq \sqrt{\mathbb{E}_{\mathbf{y}|\mathbf{x}} [(\hat{p} - \tilde{p})^4]} \sqrt{\mathbb{E}_{\mathbf{y}|\mathbf{x}} [(\hat{p} - \tilde{p})^2]}.$$

Before, we already showed that

$$\mathbb{E}_{\mathbf{y}|\mathbf{x}} [(\hat{p} - \tilde{p})^2] \leq \frac{1}{4n}.$$

Denote  $a_i = y_i - \eta_i$ , and let  $\mu_k = \mathbb{E}_{\mathbf{y}|\mathbf{x}} [a_i^k]$ . Using  $\mu_1 = 0$ , we have:

$$\begin{aligned} \mathbb{E}_{\mathbf{y}|\mathbf{x}} [(\hat{p} - \tilde{p})^4] &= \frac{1}{n^4} \sum_{i,j,k,\ell} a_i a_j a_k a_\ell \\ &= \frac{1}{n^4} \left( n\mu_4 + 3n(n-1)\mu_2^2 \right). \end{aligned}$$

Since  $\mu_2 \leq \frac{1}{4}$  and  $\mu_4 \leq \frac{1}{12}$ ,  $\mathbb{E}_{\mathbf{y}|\mathbf{x}} [(\hat{p} - \tilde{p})^4] \leq \frac{3}{16n^2}$ , and thus:

$$\mathbb{E}_{\mathbf{y}|\mathbf{x}} [|\hat{p} - \tilde{p}|^3] \leq \frac{\sqrt{3}}{8} n^{-3/2} \leq \frac{1}{4} n^{-3/2}.$$

Using similar bound for  $\mathbb{E}_{\mathbf{y}|\mathbf{x}} [|\hat{u} - \tilde{u}|^3]$ , we conclude that the third-order term is bounded by  $\frac{B}{3}n^{-3/2}$ . Bounding the third-order derivatives from below by  $-B$ , and using similar reasoning gives a lower bound of the same value. This finishes the proof.

### C.3. Proof of Theorem 3

Abbreviating  $\Phi(h) = \mathbb{E}_{\mathbf{y}|\mathbf{x}} [\Phi(\hat{u}(h), \hat{v}(h), \hat{p})]$  and  $\Phi_a(h) = \Phi_{\text{appr}}(h)$ :

$$\begin{aligned} \Phi(h_{\text{ETU}}^*) - \Phi(h_a^*) &= \underbrace{\Phi(h_{\text{ETU}}^*) - \Phi_a(h_{\text{ETU}}^*)}_{\leq \frac{B}{3n^{3/2}}} \\ &\quad + \underbrace{\Phi_a(h_{\text{ETU}}^*) - \Phi_a(h_a^*)}_{\leq 0} + \underbrace{\Phi_a(h_a^*) - \Phi(h_a^*)}_{\leq \frac{B}{3n^{3/2}}} \leq \frac{2B}{3n^{3/2}}, \end{aligned}$$

where the bounds shown in the inequalities are from Lemma 3.

### C.4. Derivation of the approximation algorithm for $F_\beta$ -measure

Recall that  $F_\beta(u, v, p) = \frac{(1+\beta^2)u}{\beta^2 p + v}$ . The second order derivatives with respect to  $u$  and  $p$  are:

$$\frac{\partial^2 F_\beta}{\partial u^2} = 0, \quad \frac{\partial^2 F_\beta}{\partial u \partial p} = \frac{-\beta^2(1+\beta^2)}{(\beta^2 p + v)^2}, \quad \frac{\partial^2 F_\beta}{\partial p^2} = \frac{2\beta^4(1+\beta^2)u}{(\beta^2 p + v)^3}.$$

To optimize  $\Phi_{\text{appr}}(h)$ , we first sort observations according to  $\eta(x_i)$ . Then we precompute:

$$\tilde{p} = \frac{1}{n} \sum_{i=1}^n \eta(x_i), \quad \tilde{p}_{\text{var}} = \frac{1}{n^2} \sum_{i=1}^n \eta(x_i)(1 - \eta(x_i)).$$

Next, for each  $k = 0, 1, \dots, n$ , we precompute:

$$\tilde{u}^k = \frac{1}{n} \sum_{i=1}^k \eta(x_i), \quad \tilde{v}^k = \frac{k}{n}, \quad \tilde{u}_{\text{var}}^k = \frac{1}{n^2} \sum_{i=1}^k \eta(x_i)(1 - \eta(x_i)).$$

We then choose  $k$  for which the ETU approximation:

$$\frac{(1+\beta^2)\tilde{u}^k}{\beta^2 \tilde{p} + \frac{k}{n}} - \frac{\beta^2(1+\beta^2)}{(\beta^2 \tilde{p} + \frac{k}{n})^2} \tilde{u}_{\text{var}}^k + \frac{\beta^4(1+\beta^2)\tilde{u}^k}{(\beta^2 \tilde{p} + \frac{k}{n})^3} \tilde{p}_{\text{var}},$$

is maximized. The maximization can be done in time linear in  $O(n)$ , so the most expensive operation is sorting the instances.

## D. Additional material to Section 4.2

Let  $\mathbf{x} = (x_1, \dots, x_n)$  be the input sample (test set) of size  $n$  generated i.i.d. from  $\mathbb{P}$ . Given  $\mathbf{x}$  and a function  $\hat{\eta}: X \rightarrow [0, 1]$ , let

$$\hat{h} = \underset{h \in \mathcal{H}}{\operatorname{argmax}} \underbrace{\mathbb{E}_{\mathbf{y} \sim \hat{\eta}(\mathbf{x})} [\Phi(\hat{u}(h), \hat{v}(h), \hat{p})]}_{=: \hat{\Phi}_{\text{ETU}}(h)}.$$



be the classifier returned by the ETU procedure upon receiving the input sample  $\mathbf{x}$ . Likewise, let:

$$h^* = \operatorname{argmax}_{h \in \widehat{\mathcal{H}}} \underbrace{\mathbb{E}_{\mathbf{y} \sim \eta(\mathbf{x})} [\Phi(\widehat{u}(h), \widehat{v}(h), \widehat{p})]}_{=: \Phi_{\text{ETU}}(h)},$$

be the optimal ETU classifier in  $\widehat{\mathcal{H}}$ . We want to bound the difference  $\mathbb{E}_{\mathbf{x}} [|\Phi_{\text{ETU}}(\widehat{h}) - \Phi_{\text{ETU}}(h^*)|]$ . By the definition of  $h^*$ ,  $\Phi_{\text{ETU}}(\widehat{h}) \leq \Phi_{\text{ETU}}(h^*)$  for any  $\mathbf{x}$ , and thus:

$$\begin{aligned} & \mathbb{E}_{\mathbf{x}} [|\Phi_{\text{ETU}}(\widehat{h}) - \Phi_{\text{ETU}}(h^*)|] \\ &= \mathbb{E}_{\mathbf{x}} [\Phi_{\text{ETU}}(h^*)] - \mathbb{E}_{\mathbf{x}} [\Phi_{\text{ETU}}(\widehat{h})] \\ &= \mathbb{E}_{\mathbf{x}} [\Phi_{\text{ETU}}(h^*)] - \mathbb{E}_{\mathbf{x}} [\widehat{\Phi}_{\text{ETU}}(h^*)] \\ &\quad + \underbrace{\mathbb{E}_{\mathbf{x}} [\widehat{\Phi}_{\text{ETU}}(h^*)] - \mathbb{E}_{\mathbf{x}} [\widehat{\Phi}_{\text{ETU}}(\widehat{h})]}_{\leq 0} \\ &\quad + \mathbb{E}_{\mathbf{x}} [\widehat{\Phi}_{\text{ETU}}(\widehat{h})] - \mathbb{E}_{\mathbf{x}} [\Phi_{\text{ETU}}(\widehat{h})] \\ &\leq 2 \sup_{h \in \widehat{\mathcal{H}}} \left| \mathbb{E}_{\mathbf{x}} [\Phi_{\text{ETU}}(h) - \widehat{\Phi}_{\text{ETU}}(h)] \right|. \quad (7) \end{aligned}$$

Now, fix some classifier  $h$  and input sample  $\mathbf{x}$ . We let  $\widehat{u}(h), \widehat{v}(h), \widehat{p}$  denote the random variables generated according to  $\eta$  (for fixed  $\mathbf{x}$ ), while  $\widehat{u}'(h), \widehat{v}'(h), \widehat{p}'(h)$  denote random variables generated according to  $\widehat{\eta}$ ; for instance,  $\widehat{u}'(h) = \frac{1}{n} \sum_{i=1}^n h(x_i) y_i$ , where  $y_i \sim \widehat{\eta}(x_i)$ . Using this notation, we have:

$$\begin{aligned} \Phi_{\text{ETU}}(h) &= \mathbb{E}_{\mathbf{y}|\mathbf{x}} [\Phi(\widehat{u}(h), \widehat{v}(h), \widehat{p})], \\ \widehat{\Phi}_{\text{ETU}}(h) &= \mathbb{E}_{\mathbf{y}|\mathbf{x}} [\Phi(\widehat{u}'(h), \widehat{v}(h), \widehat{p}')]. \end{aligned}$$

(note that  $\widehat{v}(h)$  does not depend on  $\widehat{\eta}$  or  $\eta$ , we  $\widehat{v}'(h) = \widehat{v}(h)$ ). We now bound the term under sup in (7):

$$\begin{aligned} & \left| \mathbb{E}_{\mathbf{x}} [\Phi_{\text{ETU}}(h) - \widehat{\Phi}_{\text{ETU}}(h)] \right| \\ &\leq \mathbb{E} \left[ |\Phi(\widehat{u}, \widehat{v}, \widehat{p}) - \Phi(\widehat{u}', \widehat{v}, \widehat{p}')| \right] \\ &\leq \mathbb{E} \left[ |\Phi(\widehat{u}, \widehat{v}, \widehat{p}) - \Phi(u, v, p)| \right] \\ &\quad + \mathbb{E} \left[ |\Phi(u, v, p) - \Phi(\widehat{u}', \widehat{v}, \widehat{p}')| \right], \end{aligned}$$

where the first inequality is due to Jensen's inequality applied to a convex function  $x \mapsto |x|$ , the all expectations except for the first line are joint with respect to  $(\mathbf{x}, \mathbf{y})$ , and for the sake of clarity we drop the dependence on  $h$  in  $\widehat{u}(h), \widehat{v}(h), \widehat{u}'(h)$ . Now, it follow from Lemma 1 that:

$$\mathbb{E} \left[ |\Phi(\widehat{u}, \widehat{v}, \widehat{p}) - \Phi(u, v, p)| \right] \leq c \sqrt{\frac{\log n}{n}},$$

for some constant  $c$ . Moreover, using  $p$ -Lipschitzness of  $\Phi$ , we have:

$$\begin{aligned} \mathbb{E} \left[ |\Phi(u, v, p) - \Phi(\widehat{u}', \widehat{v}, \widehat{p}')| \right] &\leq U_p \mathbb{E} [|\widehat{u}' - u|] \\ &\quad + V_p \mathbb{E} [|\widehat{v} - v|] + P_p \mathbb{E} [|\widehat{p}' - p|]. \end{aligned}$$

Now, the term  $\mathbb{E} [|\widehat{v} - v|]$  is well-controlled and was shown in the proof of Lemma 1 to be at most  $\sqrt{\frac{1}{4n}}$  as the expected deviation of the empirical average of  $[0, 1]$ -valued random variable from its mean. Thus it remains to bound the terms  $\mathbb{E} [|\widehat{p}' - p|]$  and  $\mathbb{E} [|\widehat{u}' - u|]$ . Define:

$$\begin{aligned} \widetilde{p}' &= \mathbb{E}_{\mathbf{y}|\mathbf{x}} [\widetilde{p}'] = \frac{1}{n} \sum_{i=1}^n \widehat{\eta}(x_i), \\ \widetilde{u}' &= \mathbb{E}_{\mathbf{y}|\mathbf{x}} [\widetilde{u}'] = \frac{1}{n} \sum_{i=1}^n h(x_i) \widehat{\eta}(x_i), \\ p_{\widehat{\eta}} &= \mathbb{E}_{\mathbf{x}} [\widetilde{p}'] = \mathbb{E} [\widehat{\eta}(x)], \\ u_{\widehat{\eta}} &= \mathbb{E}_{\mathbf{x}} [\widetilde{u}'] = \mathbb{E} [h(x) \widehat{\eta}(x)]. \end{aligned}$$

We decompose:

$$|p - \widetilde{p}'| \leq |p - p_{\widehat{\eta}}| + |p_{\widehat{\eta}} - \widetilde{p}'| + |\widetilde{p}' - \widehat{p}'|$$

As before, we use the fact that  $\mathbb{E}_{\mathbf{x}} [|\widetilde{p}' - \widehat{p}'|]$ , as well as  $\mathbb{E}_{\mathbf{y}|\mathbf{x}} [|\widetilde{p}' - \widehat{p}'|]$  are both the expected deviations of the empirical averages of  $[0, 1]$ -valued random variables from their means, and therefore are bounded by  $\sqrt{\frac{1}{4n}}$ . Hence:

$$\mathbb{E} [|\widetilde{p}' - p|] \leq |p - p_{\widehat{\eta}}| + \frac{1}{\sqrt{n}}.$$

Using analogous way of reasoning, one gets:

$$\mathbb{E} [|\widetilde{u}' - u|] \leq |u - u_{\widehat{\eta}}| + \frac{1}{\sqrt{n}}.$$

Putting it all together, we get:

$$\begin{aligned} & \left| \mathbb{E}_{\mathbf{x}} [\Phi_{\text{ETU}}(h) - \widehat{\Phi}_{\text{ETU}}(h)] \right| \\ &\leq c' \sqrt{\frac{\log n}{n}} + U_p |u(h) - u_{\widehat{\eta}}(h)| + P_p |p - p_{\widehat{\eta}}|, \end{aligned}$$

for some constant  $c'$ . Using (7), we finally get:

$$\begin{aligned} \mathbb{E}_{\mathbf{x}} [|\Phi_{\text{ETU}}(\widehat{h}) - \Phi_{\text{ETU}}(h^*)|] &\leq c' \sqrt{\frac{\log n}{n}} + P_p |p - p_{\widehat{\eta}}| \\ &\quad + \sup_{h \in \widehat{\mathcal{H}}} U_p |u(h) - u_{\widehat{\eta}}(h)|, \end{aligned}$$

which was to be shown.

## E. Isotron Algorithm (Kalai & Sastry, 2009)

Here we include the Isotron Algorithm of (Kalai & Sastry, 2009) for completeness. The second update step is the Pool of Adjacent Violators (PAV) routine, which solves the isotonic regression problem:

$$u_1^*, u_2^*, \dots, u_n^* = \arg \min_{u_1 \leq u_2 \leq \dots \leq u_n} \sum_{i=1}^n (y_i - u_i)^2,$$

where the instances are assumed to be sorted according to their scores  $\mathbf{w}^T x$  (using  $\mathbf{w}$  obtained in first update step of the iteration). This is a convex quadratic program and can be solved efficiently. The output link function  $u$  of the Algorithm is a piecewise linear estimate.

---

**Algorithm 2** The Isotron algorithm (Kalai & Sastry, 2009).

---

**Input:** Training data  $\{(x_i, y_i)\}_{i=1}^n$ , iterations  $T$   
**Output:**  $\mathbf{w}_T, u_T$   
 $\mathbf{w}_0 \leftarrow 0$   
 $u_0 \leftarrow z \mapsto \min(\max(0, 2 \cdot z + 1), 1)$   
**for**  $t = 1, 2, \dots, T$  **do**  
     $\mathbf{w}_t \leftarrow \mathbf{w}_{t-1} + \frac{1}{n} \sum_{i=1}^n (y_i - u_{t-1}(\langle \mathbf{w}_{t-1}, x_i \rangle)) \cdot x_i$   
     $u_t \leftarrow \text{PAV}(\{\langle \mathbf{w}_t, x_i \rangle, y_i\})$   
**end for**

---
